# Supplementary material for: Polycondensation of thiourea into carbon nitride semiconductors as visible light photocatalysts
Source: Royal Society of Chemistry journal article supplement (doi:10.1039/c2jm00097k), 2012-01-01
Supplement: c2jm00097k.pdf [file c2jm00097k.pdf]

## Electronic Supplementary Information (ESI) For

### Polycondensation of Thiourea into Carbon Nitride Semiconductors as Visible Light Photocatalysts

Guigang Zhang, Jinshui Zhang, Mingwen Zhang and Xincheng Wang\*

Research Institute of Photocatalysis, Fujian Provincial Key Laboratory of Photocatalysis-State Key Laboratory Breeding Base, Fuzhou University, Fuzhou 350002, People's Republic of China.

E-mail: [xcwang@fzu.edu.cn](mailto:xcwang@fzu.edu.cn)

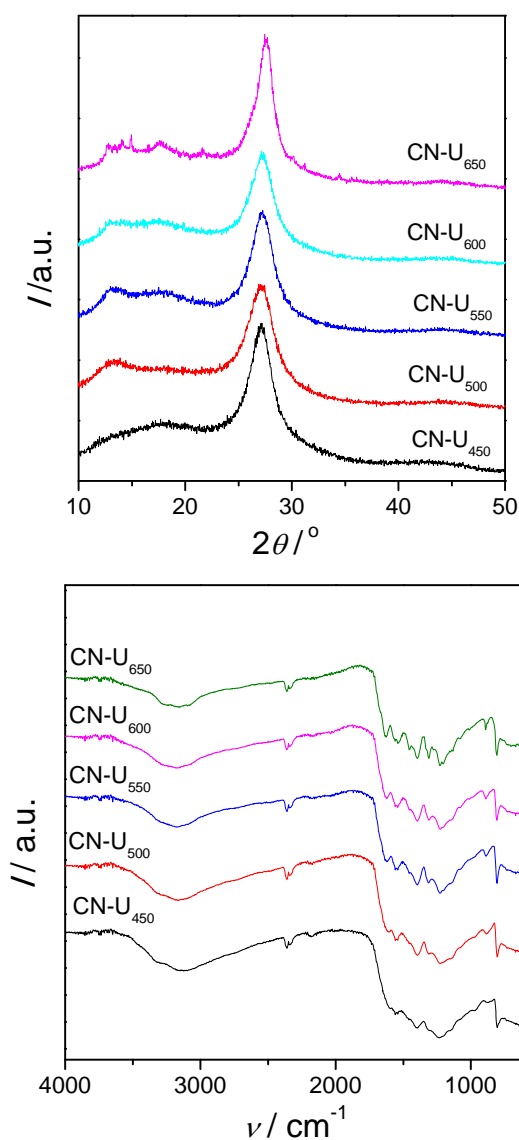

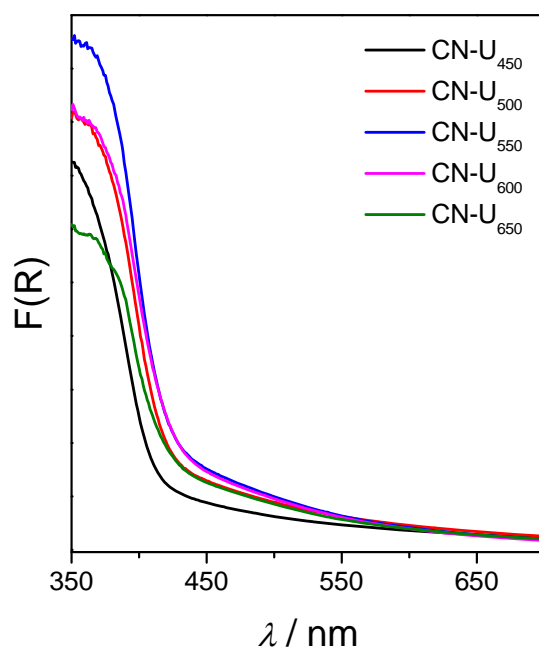

**Fig. S1.** Characterization of XRD (a), FT-IR (b) and UV-Vis spectra (c) for CN-U<sub>x</sub> samples.

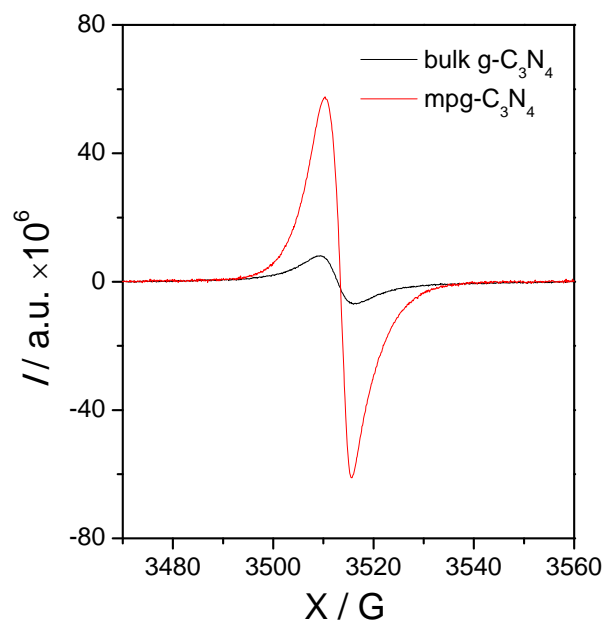

**Fig. S2.** EPR signals of bulk g-C<sub>3</sub>N<sub>4</sub> ( $S_{\text{BET}}=11 \text{ m}^2.\text{g}^{-1}$ ) and mpg-C<sub>3</sub>N<sub>4</sub> ( $S_{\text{BET}}=128 \text{ m}^2.\text{g}^{-1}$ ) at room temperature. Both of them synthesized from cyanamide precursor.
